# Supplementary material for: Data linkage can reduce the burden and increase the opportunities in the implementation of Value-Based Health Care policy: a study in patients with ulcerative colitis (PROUD-UC Study)
Source: PubMed Central journal article supplement — Int J Popul Data Sci. 2022 Nov 24;6(3):1705. doi: 10.23889/ijpds.v6i3.1705 (PMC10464864; doi:10.23889/ijpds.v6i3.1705), 2022-11-24

## Supplementary Appendix 1: data sources for cohort identification and ICHOM-IBD generation

|      | Name                                | Description                                                                                                                                                               |
|------|-------------------------------------|---------------------------------------------------------------------------------------------------------------------------------------------------------------------------|
| ADDE | Annual District Death Extract       | Mortality records from the Office for National Statistics (ONS) including cause and date of death.                                                                        |
| BIO  | Biologics                           | Records of patients receiving biopharmaceutical treatments, their dates of treatment and medicine administered and in designated outpatient clinics in two health boards. |
| EDDS | Emergency Department Data Set       | Records of attendance at Emergency Department with dates and ICD-10 clinical coding.                                                                                      |
| OPDW | Out-Patient Database for Wales      | Out-Patient records for secondary care episodes including clinic attendance.                                                                                              |
| PEDW | Patient Episode Database for Wales  | In-patient records for secondary care spells and episodes, including dates, locations and ICD-10 and OPCS clinical coding.                                                |
| PROM | Patient Reported Outcome Measures   | The IBD-control PROM questionnaire responses from patients attending biologics clinics at one health board.                                                               |
| WDSD | Welsh Demographic Service Dataset   | Residence and registration history, including linkage of Lower-layer Super Output Area (LSOA) version 2011 to Welsh Index of Multiple Deprivation (WIMD) version 2019.    |
| WLGP | Welsh Longitudinal General Practice | Primary care records with date and Read clinical coding for general practice attendances.                                                                                 |

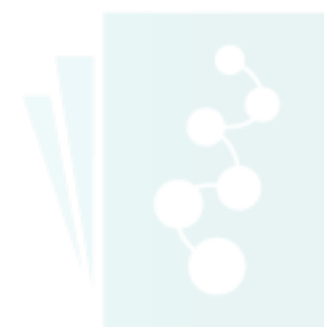

## Supplementary Appendix 2: Diagnosis Read codes

| Diagnosis              | Read_cd | Code Description                                        |
|------------------------|---------|---------------------------------------------------------|
| 0 = Crohn's disease    | J40..   | Regional enteritis -Crohns Disease                      |
| 0 = Crohn's disease    | J400.   | Regional enteritis of the small bowel                   |
| 0 = Crohn's disease    | J4000   | Regional enteritis of the duodenum                      |
| 0 = Crohn's disease    | J4001   | Regional enteritis of the jejunum                       |
| 0 = Crohn's disease    | J4002   | Crohns Disease of the terminal ileum                    |
| 0 = Crohn's disease    | J4003   | Crohns Disease of the ileum unspecified                 |
| 0 = Crohn's disease    | J4004   | Crohns Disease of the ileum NOS                         |
| 0 = Crohn's disease    | J4005   | Exacerbation of Crohns Disease of small intestine       |
| 0 = Crohn's disease    | J400z   | Crohns Disease of the small bowel NOS                   |
| 0 = Crohn's disease    | J401.   | Regional enteritis of the large bowel                   |
| 0 = Crohn's disease    | J4010   | Regional enteritis of the colon                         |
| 0 = Crohn's disease    | J4011   | Regional enteritis of the rectum                        |
| 0 = Crohn's disease    | J4012   | Exacerbation of Crohns Disease of large intestine       |
| 0 = Crohn's disease    | J401z   | Crohns Disease of the large bowel NOS                   |
| 0 = Crohn's disease    | J402.   | Regional ileocolitis                                    |
| 0 = Crohn's disease    | J40z.   | Regional enteritis NOS                                  |
| 0 = Crohn's disease    | Jyu40   | [X]Other Crohns Disease                                 |
| 0 = Crohn's disease    | N0311   | Arthropathy in Crohn s disease                          |
| 0 = Crohn's disease    | N0453   | Juvenile arthritis in Crohn s disease                   |
| 1 = Ulcerative colitis | J410.   | Ulcerative proctocolitis                                |
| 1 = Ulcerative colitis | J4100   | Ulcerative ileocolitis                                  |
| 1 = Ulcerative colitis | J4101   | Ulcerative Ulcerative Colitis                           |
| 1 = Ulcerative colitis | J4102   | Ulcerative rectosigmoiditis                             |
| 1 = Ulcerative colitis | J4103   | Ulcerative proctitis                                    |
| 1 = Ulcerative colitis | J4104   | Exacerbation of Ulcerative Colitis                      |
| 1 = Ulcerative colitis | J410z   | Ulcerative proctocolitisNOS                             |
| 1 = Ulcerative colitis | J411.   | Ulcerative (chronic) enterocolitis                      |
| 1 = Ulcerative colitis | J412.   | Ulcerative (chronic) ileocolitis                        |
| 1 = Ulcerative colitis | J413.   | Ulcerative pancolitis                                   |
| 1 = Ulcerative colitis | J436.   | Microscopic Colitis                                     |
| 1 = Ulcerative colitis | Jyu41   | [X]Other Ulcerative Colitis                             |
| 1 = Ulcerative colitis | Jyu42   | [X]Other specified noninfective gastroenteritis+colitis |
| 1 = Ulcerative colitis | N0310   | Arthropathy in Ulcerative Colitis                       |

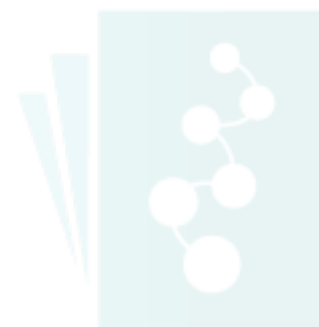

## Supplementary Appendix 2: Diagnosis ICD-10 codes

| Diagnosis                                     | Read_cd | Code Description   |
|-----------------------------------------------|---------|--------------------|
| 0 = Crohn's disease                           | K500    | Crohn's disease    |
| 0 = Crohn's disease                           | K501    | Crohn's disease    |
| 0 = Crohn's disease                           | K508    | Crohn's disease    |
| 0 = Crohn's disease                           | K509    | Crohn's disease    |
| 0 = Crohn's disease                           | M074    | Crohn's disease    |
| 0 = Crohn's disease                           | M091    | Crohn's disease    |
| 1 = Ulcerative colitis                        | K510    | Ulcerative colitis |
| 1 = Ulcerative colitis                        | K511    | Ulcerative colitis |
| 1 = Ulcerative colitis                        | K512    | Ulcerative colitis |
| 1 = Ulcerative colitis                        | K513    | Ulcerative colitis |
| 1 = Ulcerative colitis                        | K514    | Ulcerative colitis |
| 1 = Ulcerative colitis                        | K515    | Ulcerative colitis |
| 1 = Ulcerative colitis                        | K518    | Ulcerative colitis |
| 1 = Ulcerative colitis                        | K519    | Ulcerative colitis |
| 1 = Ulcerative colitis                        | K528    | Ulcerative colitis |
| 1 = Ulcerative colitis                        | M075    | Ulcerative colitis |
| 1 = Ulcerative colitis                        | M092    | Ulcerative colitis |
| 2 = Indeterminate IBD or colitis unclassified | K523    | other IBD          |

Please see the website for Supplementary Appendices 3, 4.

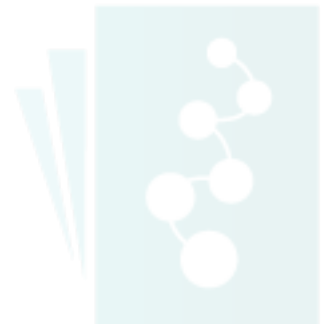

Supplement: ijpds-06-1705-s001.pdf [file ijpds-06-1705-s001.pdf]
